# Supplementary material for: Cardiomyocyte‐Specific Telomere Shortening is a Distinct Signature of Heart Failure in Humans
Source: PubMed Central journal article supplement — J Am Heart Assoc. 2017 Sep 7;6(9):e005086. doi: 10.1161/JAHA.116.005086 (PMC5634248; doi:10.1161/jaha.116.005086), 2017-09-07
Supplement: JAH3-6-e005086-s001.pdf [file JAH3-6-e005086-s001.pdf]

# **SUPPLEMENTAL MATERIAL**

**Figure S1.** Increased fibrosis in diseased cardiac tissues.

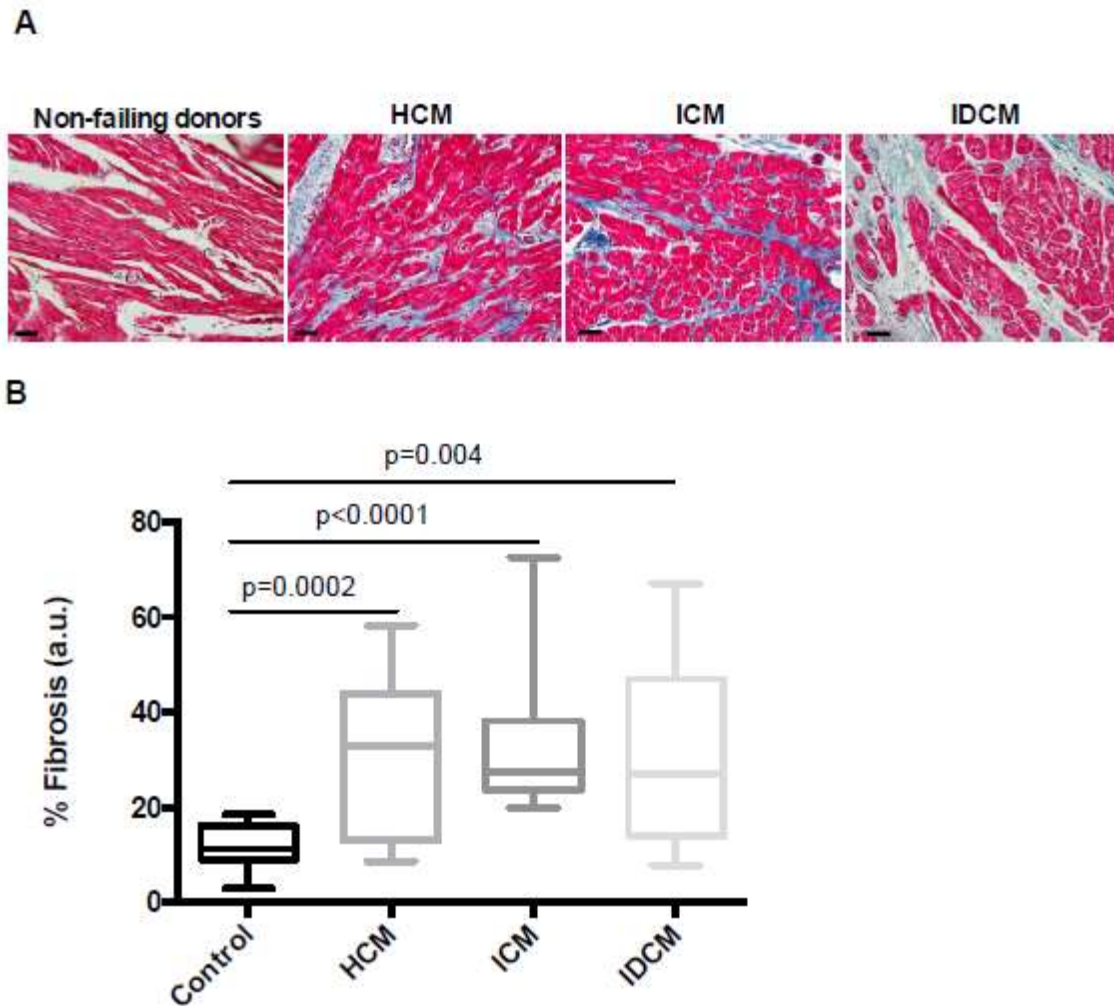

**A.** Representative trichrome staining of cardiac tissues from non-failing donors, hypertrophic cardiomyopathy (HCM), ischemic cardiomyopathy (ICM) and idiopathic dilated cardiomyopathy (IDCM) patients. **B.** Calculated fibrosis boxplots graphs are presented as % of blue area (fibrotic tissue) over whole tissue area. A total of n=26 non-failing donors, n=17 HCM, n=9 ICM and n=11 IDCM patients' samples were analyzed. Statistical comparison between non-failing donors and HCM, ICM and IDCM show significance of difference (Kruskal-Wallis,  $p=0.0002$ ,  $p<0.0001$  and  $p=0.004$ , respectively).

**Figure S2.** Telomere length measurements in ischemic (ICM) and idiopathic dilated (IDCM) cardiomyopathies.

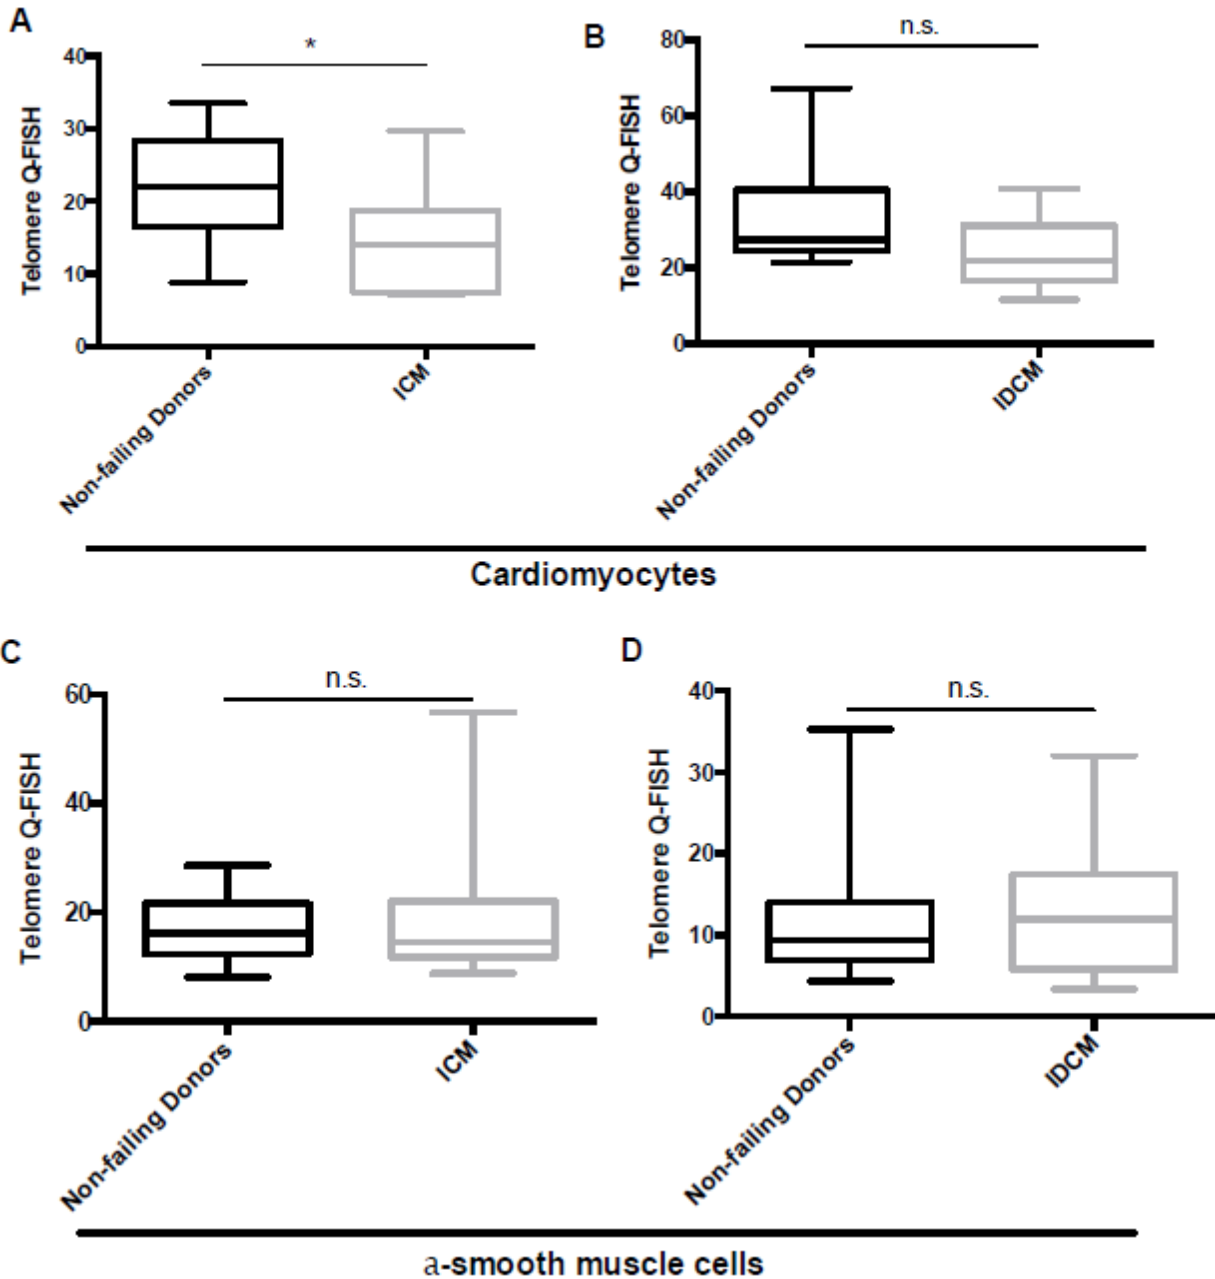

Left ventricle (LV) tissues from non-failing donors (black, n=9) and patients with ICM (grey, n=9) (A and C) and IDCM (grey, n=11) (B and D) were subjected to quantitative fluorescence *in situ* hybridization (Q-

FISH) analysis. Significant telomere shortening occurs in patient cardiomyocytes (**A**) ICM (Mann-Whitney, \*  $p=0.041$ ) but not in (**B**) IDCM (Mann-Whitney,  $p=0.101$ ), while  $\alpha$ -smooth muscle-positive cells from (**C**) ICM (Mann-Whitney,  $p=0.578$ ) and (**D**) IDCM (Mann-Whitney,  $p=0.922$ ) show comparable telomere lengths with non-failing donors. The number of nuclei (N) scored per group is shown in Table 2.
